# Supplementary material for: Preparation of paper micro-fluidic devices used in bio-assay based on drop-on-demand wax droplet generation
Source: Royal Society of Chemistry journal article supplement (doi:10.1039/c3ay41762j), 2013-11-22
Supplement: c3ay41762j.pdf [file c3ay41762j.pdf]

## Legend

Fig. S1 Schematic of the micro nozzle fabrication apparatus

Fig. S2 Photo of the micro nozzle fabrication apparatus

Fig. S3 Photo of the micro nozzles with different inner diameter in 1.5cm of tape length

Fig. S4 Relation between the diameter of the micro nozzle in 1.5cm of tape length and time delay ( $t_3$ )

Fig. S5 Photo of the forging micro nozzle process (a) un-forged micro nozzle (b) forged micro nozzle

Fig. S6 Photo of glass micro nozzle filled with wax

Table S1 Parameters of micro nozzle for forging process

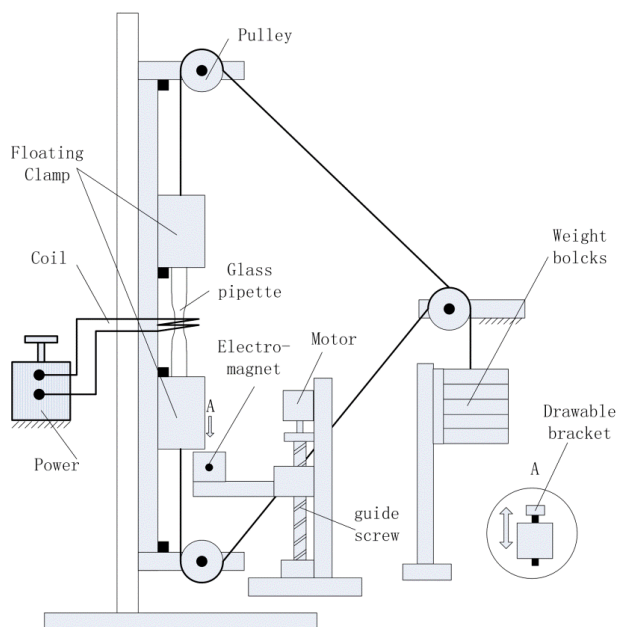

Fig. S1 Schematic of the micro nozzle fabrication apparatus

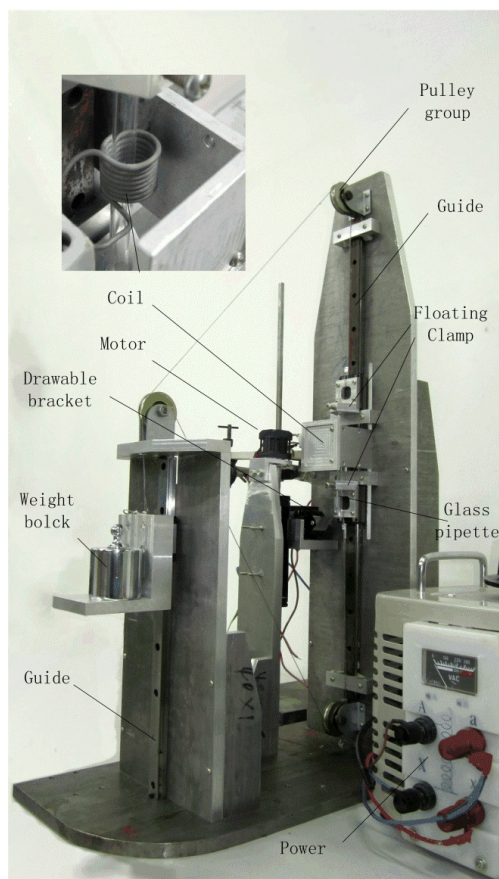

Fig. S2 Photo of the micro nozzle fabrication apparatus

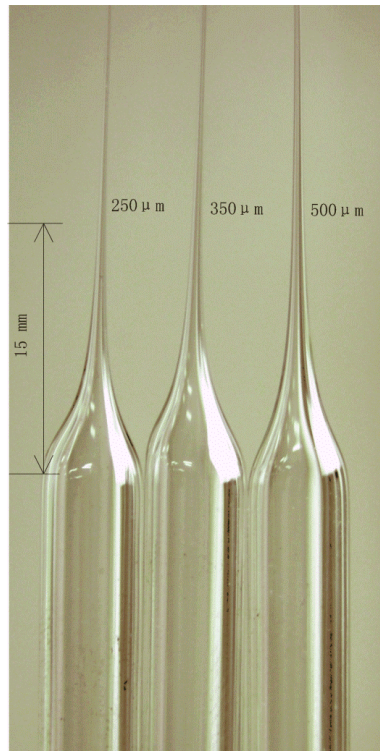

Fig. S3 Photo of the micro nozzles with different inner diameter in 1.5cm of tape length

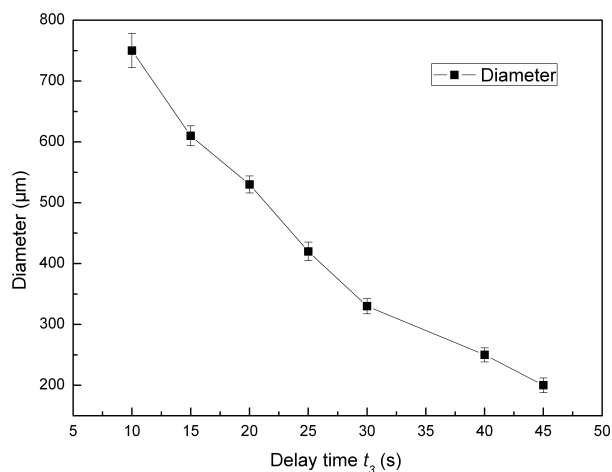

Fig. S4 Relation between the diameter of the micro nozzle in 1.5cm of tape length and time delay ( $t_3$ )

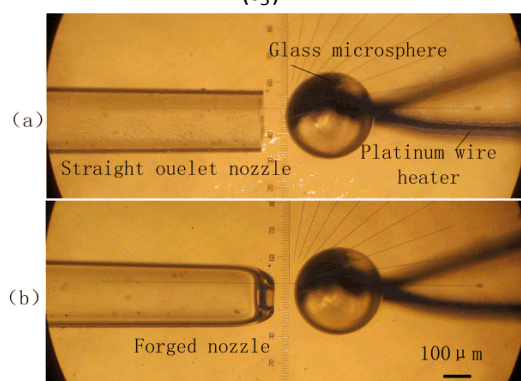

Fig. S5 Photo of the forging micro nozzle process (a) un-forged micro nozzle (b) forged micro nozzle

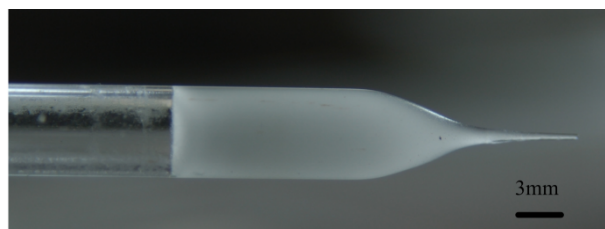

Fig. S6 Photo of glass micro nozzle filled with wax

Table S1 Parameters of micro nozzle for forging process

| Diameter of straight outlet nozzle ( $\mu\text{m}$ ) $\pm 10$ | Diameter after forging process ( $\mu\text{m}$ ) $\pm 5$ |
|---------------------------------------------------------------|----------------------------------------------------------|
| 200                                                           | 100                                                      |
| 250                                                           | 120                                                      |

---

|     |     |
|-----|-----|
| 300 | 150 |
| 400 | 200 |

---
